# Supplementary material
Source: publisher figshare collection journal article supplement (https://asha.figshare.com/articles/dataset/_/7991174)
Supplement: Supplementary file 1 [file 1]

Archive with 13 entries (13 files):
- LSHSS-18-0044fulcher-rood_SuppS1.pdf
- LSHSS-18-0044fulcher-rood_SuppS2.pdf
- LSHSS-18-0044fulcher-rood_SuppS3.pdf
- LSHSS-18-0044fulcher-rood_SuppS4.pdf
- LSHSS-18-0044fulcher-rood_SuppS5.pdf
- LSHSS-18-0044fulcher-rood_SuppS6.pdf
- LSHSS-18-0044fulcher-rood_SuppS7.pdf
- LSHSS-18-0044fulcher-rood_SuppS8.pdf
- LSHSS-18-0044fulcher-rood_SuppS9.pdf
- LSHSS-18-0044fulcher-rood_SuppS10.pdf
- LSHSS-18-0044fulcher-rood_SuppS11.pdf
- LSHSS-18-0044fulcher-rood_SuppS12.pdf
- LSHSS-18-0044fulcher-rood_SuppS13.pdf
