# Supplementary material
Source: publisher figshare collection journal article supplement (https://asha.figshare.com/articles/dataset/_/7991174)
Supplement: Supplementary file 1 [file 1 › LSHSS-18-0044fulcher-rood_SuppS1.pdf]

### Supplemental Material S1. Standardized testing score summary.

| Case     | CELF<br>SS | CELF<br>WS | CELF<br>EV | CELF<br>CL | CELF<br>RL | CELF<br>EL | CELF<br>LC | CELF<br>LS | PLS<br>AC | PLS<br>EC | PLS<br>TLS | SPELT | KBIT |
|----------|------------|------------|------------|------------|------------|------------|------------|------------|-----------|-----------|------------|-------|------|
| 1 (CG)   | 10         | 9          | 11         | 100        | 103        | 100        | 103        | 98         | 107       | 115       | 112        | 106   | 115  |
| 2 (CG)   | 7          | 1          | 5          | 67         | 75         | 57         | 69         | 61         | 77        | 67        | 70         | 58    | 89   |
| 3 (INCG) | 13         | 10         | 13         | 112        | 118        | 105        | 118        | 106        | 113       | 104       | 109        | 82    | 93   |
| 4 (INCG) | 5          | 7          | 6          | 77         | 65         | 79         | 67         | 77         | 85        | 82        | 82         | 79    | 81   |
| 5 (CG)   | 10         | 5          | 8          | 86         | 92         | 85         | 89         | 88         | 88        | 90        | 88         | 82    | 101  |

*Note.* CG = congruent case; INCG = incongruent case; CELF = Clinical Evaluation of Language Fundamentals Preschool–Second Edition (Wiig, Secord, & Semel, 2004); SS = sentence structure subtest; WS = word structure subtest; EV = expressive vocabulary subtest; CL = core language; RL = receptive language; EL = expressive language; LC = language content; LS = language structure; PLS = Preschool Language Scales–Fifth Edition (Zimmerman, Steiner, & Pond, 2011); AC = auditory comprehension; EC = expressive communication; TLS = total language score; SPELT = Structured Photographic Expressive Language Test–Third Edition (Dawson, Stout, & Eyer, 2003); KBIT = Kaufman Brief Intelligence Test–Second Edition (Kaufman & Kaufman, 2004).

### References

- Dawson, J. I., Stout, C. E., & Eyer, J. A. (2003). *Structured Photographic Expressive Language Test–Third Edition (SPELT-3)*. Chicago, IL: Janelle Publications.
- Kaufman, A. S., & Kaufman, N. L. (2004). *Kaufman Brief Intelligence Test–Second Edition (KBIT-2)*. Bloomington, MN: Pearson.
- Wiig, E. H., Secord, W., & Semel, E. M. (2004). *Clinical Evaluation of Language Fundamentals Preschool–Second Edition (CELF-P2)*. Toronto, Ontario, Canada: The Psychological Corporation.
- Zimmerman, I. L., Steiner, V. G., & Pond, R. E. (2011). *Preschool Language Scales–Fifth Edition (PLS-5): Examiner’s manual*. San Antonio, TX: Pearson.
