# Supplementary material
Source: publisher figshare collection journal article supplement (https://asha.figshare.com/articles/dataset/_/7991174)
Supplement: Supplementary file 1 [file 1 › LSHSS-18-0044fulcher-rood_SuppS2.pdf]

**Supplemental Material S2.** Teacher questionnaire summary.

| Case     | Areas on Questionnaire |                    |                |                    |        | Comments    |
|----------|------------------------|--------------------|----------------|--------------------|--------|-------------|
|          | Hearing                | Speech             | Language       | Literacy           | Rating |             |
| 1 (CG)   | Not concerned          | Not concerned      | Not concerned  | Not concerned      | 1      | High reader |
| 2 (CG)   | Very concerned         | Very concerned     | Very concerned | Very concerned     | 4      | None        |
| 3 (INCG) | Somewhat concerned     | Somewhat concerned | Not concerned  | Not concerned      | 2      | None        |
| 4 (INCG) | Not concerned          | Not concerned      | Not concerned  | Not concerned      | 2      | None        |
| 5 (INCG) | Not concerned          | Not concerned      | Not concerned  | Somewhat concerned | 2      | None        |

*Note.* Rating was given based on the following question: “Please rate this child’s language skills (grammar, sentence production, and vocabulary use).” Rating scale was 1 to 4, with 1 being *more competent than other children of a similar age* and 4 being *much less competent than other children of a similar age*. Comments were elicited by giving the following prompt: “Please provide us with any information that could help us describe/understand the language skills of this child (grammar, sentence production, and vocabulary use).” CG = congruent case; INCG = incongruent case.
