# Supplementary material
Source: publisher figshare collection journal article supplement (https://asha.figshare.com/articles/dataset/_/7991174)
Supplement: Supplementary file 1 [file 1 › LSHSS-18-0044fulcher-rood_SuppS3.pdf]

**Supplemental Material S3.** Summary of parent questionnaire.

| Question                                                                                                                                                                                                                              | Case      |           |             |             |           |
|---------------------------------------------------------------------------------------------------------------------------------------------------------------------------------------------------------------------------------------|-----------|-----------|-------------|-------------|-----------|
|                                                                                                                                                                                                                                       | 1<br>(CG) | 2<br>(CG) | 3<br>(INCG) | 4<br>(INCG) | 5<br>(CG) |
| In comparison with other children of the same age, do you think that your child has problems expressing him/herself or being understood?                                                                                              | N         | Y         | N           | N           | N         |
| In comparison with children of the same age, do you think your child has speech problems?                                                                                                                                             | N         | Y         | N           | N           | Y         |
| Do your family or friends think that your child is delayed in language?                                                                                                                                                               | N         | Y         | N           | N           | N         |
| For his/her age or in comparison with other children, does your child have difficulty producing correct phrases?                                                                                                                      | N         | Y         | N           | N           | N         |
| Do you family or friends think that your child is difficult to understand?                                                                                                                                                            | N         | Y         | N           | N           | N         |
| For his/her age, doe your child produce very short phrases?                                                                                                                                                                           | N         | Y         | N           | Y           | N         |
| Do you think that your child has problems with his/her grammar?                                                                                                                                                                       | N         | Y         | Y           | N           | N         |
| When your child talks about the same person, does he/she have difficulty using the correct pronoun like he, she, they, all the time in his/her conversation?                                                                          | N         | Y         | N           | Y           | N         |
| When your child talks about something that happened, does he/she have difficulty explaining when this happened or use words in different times? For example, talking about yesterday, might your child say “falls” instead of “fell”? | N         | Y         | Y           | Y           | N         |
| Does your child use correct phrases almost all of the time?                                                                                                                                                                           | Y         | N         | Y           | Y           | Y         |
| When your child talks does he/she have difficulty differentiating whether he/she is talking about a man or a woman?                                                                                                                   | N         | Y         | N           | N           | N         |
| In comparison with other children of the same age, does your child use many words that are too general and not descriptive such as this, that, thing, etc.?                                                                           | N         | Y         | N           | N           | N         |
| Does your child have difficulty finding the exact words to express him/herself?                                                                                                                                                       | N         | Y         | N           | N           | N         |
| Does your child have difficulty explaining or describing things?                                                                                                                                                                      | N         | Y         | N           | N           | N         |
| Is it difficulty for your child to tell you what he/she did during the day?                                                                                                                                                           | N         | Y         | N           | N           | N         |
| Is your child frustrated because he/she cannot talk well?                                                                                                                                                                             | N         | N         | N           | N           | N         |
| Do you or your child’s siblings have to repeat what you say to him/her with more frequency than with other children?                                                                                                                  | N         | N         | N           | N           | N         |
| Do you have to repeat questions or directions to your child more than to other children?                                                                                                                                              | N         | N         | N           | N           | N         |

|                                                                                                   |   |      |   |    |   |
|---------------------------------------------------------------------------------------------------|---|------|---|----|---|
| Does your child understand most of what he/she is told?                                           | N | Y    | Y | Y  | Y |
| Do you think that your child has difficulty learning new words?                                   | N | Y    | N | N  | N |
| In comparison to children of the same age, is it difficult for your child to learn new ideas?     | N | N    | N | N  | N |
| In comparison to children of the same age, does your child have a very low or limited vocabulary? | N | Y    | N | N  | N |
| Do you think that your child has a learning problem?                                              | N | N    | N | NR | N |
| Does your child have dyslexia?                                                                    | N | N    | N | NR | N |
| For his/her age, does your child have difficulty paying attention for a long period of time?      | N | N    | N | NR | N |
| Is your child hyperactive?                                                                        | N | SOME | N | NR | N |
| Does your child have difficulty attending to an activity or a game?                               | N | Y    | N | NR | N |
| For his/her age, does your child have difficulty pronouncing words?                               | N | N    | N | NR | Y |
| Is your child's pronunciation easy to understand?                                                 | N | N    | N | NR | Y |
| Is there a history of speech and language problems in the family?                                 | N | NR   | Y | NR | N |

*Note.* All questions about were followed by a *yes* and a *no* checkbox that the parent could select. CG = congruent case; INCG = incongruent case; Y = yes; N = no; NR = no response.
