# Supplementary material
Source: publisher figshare collection journal article supplement (https://asha.figshare.com/articles/dataset/_/7991174)
Supplement: Supplementary file 1 [file 1 › LSHSS-18-0044fulcher-rood_SuppS4.pdf]

#### **Supplemental Material S4. Language sample, story retell, Case 1 (congruent data).**

C Frog goes to the dinner.  
C The little boy put his clothes on.  
C The little boy um pets his dog.  
C And the frog jumps into his coat pocket.  
C And the little boy waves goodbye.  
C And the frog waves goodbye.  
E Nice job.  
C Then his family went to a fancy restaurant.  
C And the frog looked.  
C And nobody noticed him.  
C When the when the little boys famil-  
C When the little boy and his mom were looking at a menu, the frog jumped out of his pocket and went into the saxophone.  
C Then the saxophone made a big noise squeak.  
C And um the the the bo- the man looked into his saxophone.  
C And the frog jumped  
C And the frog splattered on his he- face.  
C And the man said "You broke my drum!"  
C They got mad.  
C And then the frog jumped into the salad.  
C And the waitress gave the salad to the woman.  
C But the woman didn't notice.  
C The woman-  
C Before the woman took a bite a big bite the frog jumped out.  
C Then the then the woman screamed ah.  
C Then the frog then the frog jumped into the wine.  
C Then the woman yelled at the waitress.  
C And then before the the um man took a drink with his wife the frog kissed him on the nose.  
C Then the frog waved goodbye.  
C And then the woman and his husband left.  
C Then the waitress gr-  
C Then the waitress grabbed the frog.  
C And the little boy said "That's mine!"  
C And his mother said "Shh".  
C The f- the little boy said "Can I have my frog back"?  
C Then leave with the frog and stay out.  
C And then when the little boy went in the car when they left.  
C And the moth- the whole family was mad at him.  
C Then the dad said "Go to your room now!"  
C And his do- turtle and his fr- and his dog looked out and peeked.  
C But no- nobody noticed.  
C Then the little boy and the frog laughed when a- wh- what the frog all did at the the f- fancy restaurant.  
E You did such a good job.  
E That was awesome.
