# Supplementary material
Source: publisher figshare collection journal article supplement (https://asha.figshare.com/articles/dataset/_/7991174)
Supplement: Supplementary file 1 [file 1 › LSHSS-18-0044fulcher-rood_SuppS5.pdf]

## **Supplemental Material S5. Language sample, picture elicitation, Case 1 (congruent data).**

E I've got a couple more pictures to show you.  
E I want you to tell me about them.  
E What's going on here?  
C The they're digging up sand.  
C Trying to look for turtle eggs.  
C And uh  
E Have you ever been to the beach before?  
E What did you do while you were there?  
C Um just went in the water.  
C Once I w- I went in the deep end with my sister.  
C And the water went up my nose.  
E Oh.  
C Then it got out.  
E Did it hurt?  
C Uh not that much.  
E That's good.  
E What else did you do at the beach?  
C Um then I had to go back.  
C Then when I went back I digged myself into the wa-  
C I digged myself into the sand.  
E Fun.  
E What is going on here?  
C Santa's waving goodbye.  
E What is he riding in?  
C Um a truck.  
E Is that normally what he rides in?  
E Tell me what he normally rides in.  
C A sled.  
E What's going on here?  
C The kids had a party at McDonalds.  
E Have you ever been to McDonalds before?  
E What do you do when you're there?  
C I usually eat.  
C I always have always have um hamburgers.  
C Because they're delicious.  
E Mhm.  
C But I never have chicken nuggets.  
C I don't like them.  
E Have you ever been to a birthday party at McDonalds?  
E Do you ever go in the Play Place?  
C Uhuh.  
E Who do you go there with?  
C My family.  
C So Kianna, Cameron, Mommy, Daddy, Olivia, and Derrick.  
E Wow.  
E Big family.  
E What's going on here?  
C A little boy got hurt.  
C And a girl said "Are you okay" because he was outside playing on the playground.  
C And he tripped and fell.  
c And he was crying.

E Mhm.

E Has that ever happened to you before?

C Uh only sometimes.

C Just sometimes.

C Not all the time
