# Supplementary material
Source: publisher figshare collection journal article supplement (https://asha.figshare.com/articles/dataset/_/7991174)
Supplement: Supplementary file 1 [file 1 › LSHSS-18-0044fulcher-rood_SuppS6.pdf]

## **Supplemental Material S6.** Language sample, story retell, Case 2, congruent data.

E So what's that.  
C Froggy and a turtle.  
E Uhuh.  
E And a turtle.  
E So what are they doing?  
C I don't know.  
E You don't know.  
E Alright.  
E How about here?  
E What is the boy doing?  
E You don't know what he's doing?  
E He's petting the um the dog.  
E What is how about there?  
E What's that.  
C froggy.  
E Mhm.  
E And what did the frog do?  
C Get in bucket.  
E Mhm.  
E And here?  
E What are they doing?  
E What is this?  
C Bye.  
E They're saying bye.  
E To who?  
C Doggie and XX.  
E Mhm.  
E And here?  
E Where did they go?  
C I don't know.  
E You don't know?  
E Maybe they went to a restaurant.  
E How about here?  
E What are they looking at?  
E What are they doing right there?  
E How about here?  
E What did he do?  
C I don't know.  
E You don't know what he's doing?  
E He's jumping.  
E So what happened here?  
E Oh wait, be careful.  
E It might break.  
E Ok.  
E So, what happened here?  
C I don't know.  
E And what is he doing?  
E No, like right here.  
E What is he doing?  
C He saying bye mommy X.  
E Mhm.  
E And here?

E What did the frog do?  
E Look.  
E On this page.  
E He what did you do?  
C Get frog out.  
E Mhm.  
=child laughs  
E And here?  
E What happened?  
C He got frog.  
E Mhm.  
E How about here?  
E What are they doing?  
C Xing.  
E And what did the frog do.  
C Jumping.  
E In where?  
C In there.  
E Mhm.  
E And there.  
E And how about here?  
E What is she doing?  
E What is she doing?  
E Do you want to try the next page?  
E Alright.  
E How about the here?  
E What happened.  
C Jump over in here.  
E Mhm.  
E And the lady?  
C Hm I don't know.  
E You don't know?  
E How about here?  
E What happened?  
E What is the lady doing?  
C Don't know.  
E How about here?  
E What's happening here?  
C Don't know.  
E You don't know what he's doing?  
E And this one?  
E What is he about to do?  
E He's going to~  
C Get him.  
E Mhm.  
E And here?  
E What is he doing?  
C On walk way.  
E Mhm.  
E And what did the boy say?  
C XXX.  
E And what did the mommy say.  
C I don't know.  
E How about here?

E What did the boy saying?  
E Right here.  
E What is the boy saying?  
C I don't know.  
E And here?  
E What do you think he's saying?  
C I don't know.  
E What about this one?  
C I don't know.  
E What do you think the dad's saying?  
C I don't know.  
E You don't you don't know what he's saying?  
E And what is the boy doing?  
E Look.  
E What is the boy doing?  
E How about here.  
E What are they doing?  
C I don't know.  
E You know what they're doing.  
E You've never laughed?  
E Alright.
