# Supplementary material
Source: publisher figshare collection journal article supplement (https://asha.figshare.com/articles/dataset/_/7991174)
Supplement: Supplementary file 1 [file 1 › LSHSS-18-0044fulcher-rood_SuppS7.pdf]

## **Supplemental Material S7. Language sample, picture elicitation, Case 2, congruent data.**

E So, now what I'm going to do is show you some pictures.  
E Oh no.  
E Wait.  
E We're almost done.  
E Can you look at these pictures.  
E And tell me which one which ones you want to talk about.  
E And when you pick one, just tell me everything you know about it.  
E Those two?  
E Alright.  
E First let's start with this one.  
E Why did you pick this one?  
E XXX.  
C Old Old McDonalds.  
E Alright.  
E So this one.  
E What happened in this one?  
C Leaves are falling down.  
E Mhm.  
E Leaves are falling down, ok.  
C It's going to be all day.  
E Mhm.  
E Because that's snow.  
E So what are they doing?  
C Playing around leaves.  
E Mhm.  
E They're playing around leaves.  
E And here?  
C And he's gonna be winter.  
C And he's gonna be winter.  
C Leaves falling down with snow.  
E Mhm.  
C Going fall down.  
E And what about here?  
E What are they doing?  
C Making snowman.  
E Mhm.  
E Have you ever made a snowman?  
E You never made one?  
E Do you know how to make one?  
E Alright.  
E So, do you want to pick other ones to like talk about?  
E Look, there's a lot more.  
C XXX.  
C Going be Halloween day.  
E So what do you do on Halloween?  
C Get candy.  
E Really?  
E How?  
C I don't know.  
E Hm, maybe you go trick-or-treating.  
E Do you go trick-or-treating?  
C Yes.

E What are you going to be?  
C Iron man.  
E Iron man?  
C Yeah.  
E So, who bought you the present?  
E Like who got you the thing and the costume?  
E Your mommy?  
C Mommy.  
C Yeah.  
E Mhm.  
E And what's your favorite candy?  
C Hm, jacket.  
E You don't know what your favorite candy is?  
C Yeah, I do.  
C Yacket.  
E Yacket?  
E Alright.  
E How about here?  
E Are there any more p -  
E Mhm.  
E Are there any more pictures you want to talk about?  
E Look.  
E There?  
E Where is that?  
C You eat there.  
E You eat there.  
E And what do you eat.  
C McDonalds.  
E At McDonalds, mhm.  
E Have you ever gone there?  
C Yeah.  
E With who?  
C With mommy, and daddy, and Mia.  
E And what do you Oh no, wait, we are almost done what do you get there?  
C I don't know.  
E You don't know.  
C I got toy.  
C I got burger toy.  
E Mhm.  
E You got toys.  
C Yeah.  
E They're having a birthday party.  
E Have you ever had one?  
C No.  
E You never had a birthday party?  
C No.  
C I only got birthdays.  
C XX birthday cake.  
E Mhm.  
E Have you ever gotten a birthday present?  
C No.  
E Have you ever gotten any kind of present?  
C Hm I got new X.  
E Mhm.

E What kind what have you ever gotten any other present?  
C No.  
E No?  
E Alright.  
E What's happening here?  
C I don't know.  
E You don't know.  
E Maybe she got hit.  
E Have you ever gotten a boo-boo?  
C No.  
E No?  
E What is she doing?  
C Putting a Band-Aid on here.  
E Mhm.  
E Putting a Band-Aid.  
E What does this look like?  
C I don't know.  
E Maybe like a classroom.  
E No?  
E Oh, it fell off.  
E We're almost done.  
E And then you get to go back to your classroom.  
E Alright XX.  
E What's this?  
C I don't know.  
E You don't know who that is?  
E Maybe he's Santa Claus.  
E It's not Santa Claus?  
E Do you know who Santa Claus is?  
E And here?  
E Do you know what that is?  
E Have you ever gone to a beach?  
E Alright.
