# Supplementary material
Source: publisher figshare collection journal article supplement (https://asha.figshare.com/articles/dataset/_/7991174)
Supplement: Supplementary file 1 [file 1 › LSHSS-18-0044fulcher-rood_SuppS8.pdf]

## **Supplemental Material S8. Language sample, story retell, Case 3, incongruent data.**

C To go to the different X he was X.  
E Mhm.  
C I don't know what that was.  
E What was he doing?  
C That one.  
C It try to be fancy.  
E Mhm.  
C XXX.  
C He said X.  
C Then the frog jumped in him pocket.  
E Mhm.  
C And he didn't say goodbyes.  
C They didn't notice.  
C But the the didn't notice.  
C But they're getting the man.  
C But they're getting XX.  
C XX is the frog jumped out that XX.  
C It says squeak.  
C And there's and there is a a XX.  
C XXX.  
E Say that again.  
C Squeaking sound.  
E It made a squeaky sound.  
E And then what?  
C It fall came down.  
C XXX.  
C "Why are X w- XX to my drum"?  
C The those when the others saw, the frog the jumped in the salad.  
C Then and then uh the lady didn't notice the frog peeking in her salad.  
C Then h- her that's her.  
C Then the frog jumped out of the salad but in the XX.  
C He was with the the frog kiss on him nose.  
C And her be angry.  
C And the this girl goes to her XX.  
C And then then him say, "That/'s my frog"!  
C Then I say, "not no I can take this but ow".  
E And then~  
C Then -  
C I don't know the other part.  
E What did he say?  
C I don't know.  
E Right here.  
C "You can you can have that frog back".  
E Mhm.  
C Then the family be angry at him.  
C Then him said, "Go in him room".  
C And then then they were laughing about the restaurant.  
C And laugh more and more and more XX.  
E Is that the end?  
E Good job.
