# Supplementary material
Source: publisher figshare collection journal article supplement (https://asha.figshare.com/articles/dataset/_/7991174)
Supplement: Supplementary file 1 [file 1 › LSHSS-18-0044fulcher-rood_SuppS9.pdf]

### **Supplemental Material S9. Language sample, picture elicitation, Case 3, incongruent data.**

E So now we're gonna look at some pictures.  
E Can you -  
E Here.  
E Pick a picture.  
E Pick one.  
E Alright.  
E Tell me about that one.  
C It's a - it's Halloween.  
E Mhm.  
C And dressed up all X.  
C And them get candy.  
E Mhm.  
C And them wearing costumes.  
E You have something from Halloween, don't you?  
C Mhm.  
E What is it?  
C I be a monkey.  
E You were a monkey?  
E What about this that you have from Halloween?  
E What is that?  
E Tell me about it.  
C This is a  
E Where is it?  
C This is  
E Remember you were showing me earlier?  
C Uh  
E There it is!  
E What is that?  
C A tattoo.  
E What is that?  
C I\* uh before sissy's school X we I didn't put it on because I couldn't.  
E You didn't put it on?  
E So who put it on for you?  
C S - today mama put it on.  
C And daddy c- also said he'd be home.  
C So that's put it on.  
C Oh I find XX.  
C I didn't know I - where it were befores.  
E Oh.  
C Then I find it.  
C Why why then he that's kept it on.  
E Oh.  
C But I had to put my arm under cold water.  
C X cold.  
E You did?  
C I didn't like cold water.  
C But when it's on my hands, I like them.  
C But not when I get shivers.  
C I am gonna get {shivers} cold.  
E It's too cold?  
C But when  
E So you put that on today?

C Yeah.  
C And I didn't like the cold water.  
E Oh no.  
E So what were you for Halloween, a monkey?  
E Did you go trick-or-treating?  
E No?  
C No.  
C We just go to sissy's school where it's really nighttime w - when we go.  
E Oh.  
E Alright.  
E Tell me about this picture.  
C Just a snowman.  
C And then they're dressed up for winter.  
E Yup.  
E What else?  
C I don't know what else.  
E How do you make a snowman?  
C You get snow, roll it up and get balls.  
E And then~  
C Don't know.  
E You don't know how to make a snowman?  
C Yeah.  
C But I need help.  
E Okay.  
E So what would you do first?  
C Get me a big ball, and a short ball, and medium size.  
C And they then a small ball and nose and then the rocks and then no something.  
E Sounds like you just made a snowman.  
C Yeah.  
E Alright.  
E And what about this picture?  
C Santa.  
C I only know that for Christmas.  
C But don't XX.  
E What is he doing?  
C Riding a car.  
E Is he usually in a car?  
C Uhuh.  
C No.  
E What is he usually in?  
C Uh a a truck.  
E You mean a sleigh?  
C Yeah.  
E Because he's in a truck right now.  
C Yeah.  
E Yeah.  
E Have you ever seen Santa?  
E No?  
E Never in person?  
E But he leaves you presents, right?  
C Yeah.  
E Lot/s of them?  
C Um some of them.

C But I get lots of toys.  
E Really?  
E Like what?  
C Very lots of toys.  
C But I don't know we be got where the are.  
E Mhm.  
C One day I lost a puppy.  
C But now I find it XX big, big X.  
E Where was the crate?  
C Crate?  
E Crate.  
E You said you found the puppy in the crate?  
C No.  
C A small puppy.  
C Be stuffed animal with these hearts on it.  
C And they liked it.  
C But then they put it in the gray one.  
C I couldn't find it.  
C Then I find it.  
C F - sissy find it.  
C And then I couldn't find it.  
C Tangled in the area where the s- Barbies.  
C Ooh got you.  
C Though then I then the move though I put him in my f - house.  
C And it's a the one a a X house.  
C I had to put it on the ta- table.  
C Be there right next to my window.  
E Got you.  
C Then I couldn't then I know where it is now.  
C But now, I l- I sleep with horsey because I have to sleep with a stuffed animal.  
C Because I afraid of the>  
E Dark?  
E Oh.  
E Do you have a night light?  
C A turtle light night.  
E Oh.  
C It had different colors.  
C But you have to put one on.  
C Choose purple.  
E Ooh.  
C Because I love purple.  
E That's cute.  
E Anything else?  
E No?  
E You're all done?  
C Yeah.
