# Supplementary material
Source: publisher figshare collection journal article supplement (https://asha.figshare.com/articles/dataset/_/7991174)
Supplement: Supplementary file 1 [file 1 › LSHSS-18-0044fulcher-rood_SuppS10.pdf]

### **Supplemental Material S10.** Language sample, story retell, Case 4, incongruent data.

C The dog and frog and turtle are looking at him getting dressed.

C He said bye.

C And he pet the doggy.

C And he looked at the window.

E Mhm.

E How about here?

C They're waiting they're waiting for the dinner.

C The frog is jumping in there.

E In there?

E Alright.

E How about here?

C He jumped in there.

C Sound squeaky.

E Mhm.

C And he looked in there.

C He jumped on the man's head.

C And he he jumped on his face.

E Mhm.

E And then what happened here?

C He broke the -

C He said broke he broke my music.

E That's fine.

E And what did the frog do?

C He jumped in the dinner.

E So what happened here?

C The girl saw the frog.

C And the frog was un- underneath the salad.

E Mhm.

E How about here?

C The frog went away and jumped in the man's glass.

C And XX mad.

C And he kissed him.

E Mhm.

E He kissed him.

E And then here?

C He trying to catch the frog.

C And he said -

E How about here?

C Give me the frog.

C And he supposed to be quiet.

C Said give me the frog.

C And mother said get the frog out of here.

E How about here?

C He's angry with his family.

E Mhm.

E And here?

C Take him to your room.

C And he laughed.

E Alright.

E Thank you.
