# Supplementary material
Source: publisher figshare collection journal article supplement (https://asha.figshare.com/articles/dataset/_/7991174)
Supplement: Supplementary file 1 [file 1 › LSHSS-18-0044fulcher-rood_SuppS11.pdf]

## **Supplemental Material S11.** Language sample, picture elicitation, Case 4, incongruent data.

E Now I'm gonna show you some pictures.  
E And I want you to pick which one you want to talk about.  
E And you've gotta tell me something about them.  
E Alright.  
C He's got a boo-boo on his leg.  
C And the girl said what happened?  
E Has this happened to you?  
E You've never fell?  
E Ok.  
E Then let's try one of these.  
E Which one do you like?  
E And you've gotta talk about it.  
E That one?  
C He's building a sandcastle.  
C And they got a shovel and pail.  
C And they're digging a deep hole.  
E Mhm.  
E Have you ever been around it?  
E When?  
C I don't know.  
E What is what are they doing there?  
C Building a hole.  
E Have you ever went swimming.  
C Mhmh.  
E Let's try one of these.  
E That one?  
E Tell me about it.  
C Santa\_Claus and the van.  
C He's waving.  
E What does he do?  
C Give presents to everybody.  
E Mhm.  
E Is Santa always in this?  
E Alright.  
E What is he usually in?  
C Uh s- I don't know.  
E That's fine.  
C A truck.  
E Mhm.  
E Ok.  
E Let's try this one.  
C They are having a birthday party.  
E Where?  
C In their house.  
E Have you ever been here before?  
E Do you know what this is called?  
C Um.  
E It's called McDonalds.  
E Have you ever gone to McDonalds?  
E What do you get there?  
C Mm french fries.  
E Is that it?

E What do you usually do in a birthday party?

C Mm eat at the -

E Have you had a birthday party?

E No?

E Alright.

E What is he doing?

E Or who is he?

C The McDonalds.

C He's waving hello.

E Mhm.

E Um let me see.

E Um let's see.

E What do you usually eat in a birthday party?

C Mm McDonalds.

E How about cake?

E Do you like cake?

E What about it do you like?

C Um I don't know.

E You don't know?

E Alright.

E I think that's good.

E We'll just stop.
