# Supplementary material
Source: publisher figshare collection journal article supplement (https://asha.figshare.com/articles/dataset/_/7991174)
Supplement: Supplementary file 1 [file 1 › LSHSS-18-0044fulcher-rood_SuppS12.pdf]

## **Supplemental Material S12.** Language sample, story retell, Case 5, congruent data.

C Um getting dressed.  
E Mhm.  
C Um.  
E So what are what is that?  
C Doggy, frog, a turtle.  
E And what are they doing?  
C Um looking at the boy.  
E Mhm.  
E Just keep doing that.  
E And here, what is he doing?  
C Petting the dog.  
E And here?  
C A frog.  
E What is the frog doing?  
C Um checking the pole.  
E Mhm.  
E And here?  
C Um saying bye to their friends.  
E Mhm.  
E And what is he what is that?  
C Um a frog.  
E So now here, what happened?  
C Um hm.  
E Where did they go?  
C To a restaurant.  
E Mhm.  
E And here, what are they doing here?  
C Um eating.  
E And what did he do?  
C Um going in the room sick.  
E Mhm.  
E So what happened here?  
C Um have been there.  
E Mhm.  
E And what is he doing.  
C Looking for a frog.  
E So what happened here?  
C Um the froggy was going on the drum.  
E Mhm.  
E So then what did he do?  
C Fall down the drum.  
E Mhm.  
E What are they doing?  
C Um poke the drum.  
E Mhm.  
C Umhm going out to play.  
E Mhm.  
E And here?  
C Um the froggy's in there.  
E What does she do?  
C Eating.  
E And what happened.

C Um watching the frog.  
E Mhm.  
E And here?  
C The froggy jumped.  
E What is she doing?  
C Um eating.  
E Mhm.  
C Um there was drinking the cup.  
E Mhm.  
E And what did the froggy do?  
C Um in the cup.  
E Mhm.  
E What did she do?  
C Um talking to the boy.  
E And what happened here?  
C Um the frog to kiss the boy.  
E Mhm.  
E And what is he doing?  
C Um grabbing the frog.  
E Mhm.  
E And here?  
E What is he -  
C Um throwing the frog away.  
E And what did the boy say?  
C Don't scream.  
E And what did the mom say?  
C Be quiet.  
E So what is the boy doing now?  
C Um talking to the boy.  
E So what did he say?  
C Um give me my frog back.  
E Mhm.  
E And what did he say?  
C Um hm.  
E It's whatever you think.  
E What do you think he said?  
C Um get that froggy to the jungle.  
E (laughs) Mhm.  
E And here, what's happening?  
C Um going home.  
E And how about -  
E What are they doing.  
C Um talking to the mom.  
E Mhm.  
E What did the dad say?  
C Um go in your living room.  
E And what are they doing.  
C Um hanging.  
E Mhm.  
E Now, what are they doing now?  
C Um laughing.  
E Why are they laughing?  
C Because.  
E Alright, thank you.
