# Supplementary material
Source: publisher figshare collection journal article supplement (https://asha.figshare.com/articles/dataset/_/7991174)
Supplement: Supplementary file 1 [file 1 › LSHSS-18-0044fulcher-rood_SuppS13.pdf]

### **Supplemental Material S13.** Language sample, picture elicitation, Case 5, congruent data.

E Now what I'm gonna do is I'm gonna show you some pictures.  
E And I want you to pick the ones you want to talk about.  
E And you just tell me everything you know about those pictures.  
E Pick which ever one you want to talk about.  
C Um.  
E That one?  
E Alright.  
C Um Santa.  
E Mhm.  
E Who's Santa?  
C Um, hm.  
E What does he do?  
C Um give presents to everybody.  
E Oh my god, what does he give?  
E What did you get?  
C Um, uh I can get butterfly.  
E You got a butterfly?  
C No.  
C But Santa's giving me it.  
E He's giving it to you.  
E Alright, and what else have you gotten?  
C Master high toys.  
E Oh, so what does Santa go on?  
E Like, what is he in right now?  
C A truck.  
E Is he always in a truck?  
E What about sleds?  
E That too.  
E Have you gotten any other presents?  
C Yeah.  
E Like what?  
C A bear.  
E You got a bear?  
E What does the bear look like?  
C Um it's a white bear.  
E Mhm.  
C It's X one.  
E It's a aw that's cute.  
E Do you ok so now let's talk about another picture.  
E So pick whichever one you want to talk about.  
E That one, alright.  
E Tell me everything you know.  
C A snowman.  
E Mhm.  
C They're playing in the snow.  
E Mhm.  
C An-  
E What are they wearing.  
C A sweater.  
E Mhm.  
C And buttons.  
E Have you ever made a snowman?

E You have?  
E How do you do one?  
E How do you make it?  
C Um with little um circles.  
E Mhm.  
E So explain to me how they made it.  
C Um they make it with snow.  
E Mhm.  
E Alright, let's talk about another one then.  
E Look, which one do you wanna talk about now.  
C Hm.  
E That one.  
E Alright.  
E So now tell me everything you know about this picture.  
C Uh they're playing in the sand.  
E Mhm.  
E What are they using.  
C A shovel.  
E Is that it?  
E So what are they doing right now?  
C Making a sandcastle.  
E Have you ever made one?  
E How do you make it?  
C With a castle.  
E With a castle.  
E And what else can you do at the beach?  
C Make a bear.  
E Make a bear.  
E How about what's this called?  
C Uh hm.  
E Maybe you could go swimming.  
E Have you ever gone to the beach?  
E What do you do in it?  
E Like who went with you?  
E Tell me that.  
C Um my sister Breezy and Brooke.  
E Mhm.  
C Breezy hold me in the under water.  
E Well that's nice.  
E Did you have fun?  
E That's good.  
E Alright, so let's pick one more.  
E Which one do you want to talk about?  
E That one?  
E Alright, tell me everything you know about that picture.  
C Um uh hm hm hm hm hm the kid falled.  
E Aw and what happened?  
C Um that uh boo-boo.  
E Aw what is she doing.  
C Um making him feel better.  
E Has that ever happen to you?  
E Tell me what happened.  
C I falled down on the stairs.  
E Aw and what did they do to make you feel better.

C Um they put um some medicine on it.  
E Oh ok that's good.
